# Supplementary material for: Optimization Rules for SARS-CoV-2 Mpro Antivirals: Ensemble Docking and Exploration of the Coronavirus Protease Active Site
Source: PubMed Central journal article supplement (PMC7552026; doi:10.3390/v12090942), 2020-08-26
Supplement: viruses-12-00942-s001.pdf [file viruses-12-00942-s001.pdf]

| Supplementary Table 1: Docking scores for Zinc database inhibitors in |                                 |                                    |                                    |                  |
|-----------------------------------------------------------------------|---------------------------------|------------------------------------|------------------------------------|------------------|
| PDB File                                                              | 5R7Z<br>-log <sub>10</sub> (Kd) | 5R7Z-CS<br>-log <sub>10</sub> (Kd) | 6LU7-CS<br>-log <sub>10</sub> (Kd) | Compound         |
| 6W63                                                                  | 4.383                           | 7.1804                             | 7.0446                             | X77              |
| 5REC                                                                  | 4.77                            | 5.9197                             | 5.7341                             | Z1587220559      |
| 5RF8                                                                  | 4.38                            | 5.422                              | 5.4206                             | Z271004858       |
| 5RF7                                                                  | 5.42                            | 5.371                              | 5.3587                             | Z316425948_minor |
| 5R84                                                                  | 3.214                           | 4.8417                             | 5.6658                             | Z1262246195      |
| 5RE9                                                                  | 4.836                           | 4.5812                             | 5.5103                             | Z2856434836      |
| 5R7Z                                                                  | 4.48                            | 4.5759                             | 5.2858                             | Z1220452176      |
| 5RFD                                                                  | 2.784                           | 4.5417                             | 4.4952                             | Z126932614       |
| 5REE                                                                  | 5                               | 4.4794                             | 4.6783                             | Z2217052426      |
| 5REX                                                                  | 3.374                           | 4.4731                             | 4.4132                             | PCM-0102287      |
| 5REY                                                                  | 3.259                           | 4.3204                             | 3.7805                             | PCM-0102911      |
| 5RE8                                                                  | 4.235                           | 4.3139                             | 4.404                              | Z2737076969      |
| 5REL                                                                  | 3.55                            | 4.3093                             | 4.4488                             | PCM-0102340      |
| 5REN                                                                  | 2.292                           | 4.2897                             | 4.5277                             | PCM-0102425      |
| 5RFP                                                                  | 3.88                            | 4.2724                             | 3.1721                             | PCM-0102190      |
| 5RE6                                                                  | 1.822                           | 4.2561                             | 5.7345                             | Z54571979        |
| 5RF0                                                                  | 2.903                           | 4.2519                             | 5.2252                             | POB0073          |
| 5RET                                                                  | 4.68                            | 4.1565                             | 4.3177                             | PCM-0102269      |
| 5RFL                                                                  | 3.258                           | 4.1123                             | 4.3131                             | PCM-0102389      |
| 5R82                                                                  | 2.609                           | 4.0704                             | 4.8051                             | Z219104216       |
| 5RFW                                                                  | 3.085                           | 3.9684                             | 3.6825                             | PCM-0102243      |
| 5RFR                                                                  | 2.775                           | 3.9552                             | 3.9275                             | PCM-0102169      |
| 5RF6                                                                  | 1.58                            | 3.9388                             | 4.8775                             | Z1348371854      |
| 5RFH                                                                  | 3.039                           | 3.9254                             | 3.193                              | PCM-0102277      |
| 5RFS                                                                  | 3.014                           | 3.8521                             | 4.1247                             | PCM-0102739      |
| 5RFB                                                                  | 3.74                            | 3.8016                             | 3.6927                             | Z1271660837      |
| 5RFJ                                                                  | 2.199                           | 3.7551                             | 3.8153                             | PCM-0103067      |
| 5REW                                                                  | 2.625                           | 3.7105                             | 3.3532                             | PCM-0102275      |
| 5RE7                                                                  | 3.26                            | 3.7039                             | 4.4737                             | Z30932204        |
| 5REG                                                                  | 3.022                           | 3.6734                             | 5.6769                             | Z1545313172      |
| 5REZ                                                                  | 2.771                           | 3.5535                             | 3.7781                             | POB0129          |
| 5REF                                                                  | 3.651                           | 3.4622                             | 2.6277                             | Z24758179        |
| 5RF4                                                                  | 2.149                           | 3.4302                             | 4.7708                             | Z1741982125      |
| 5R81                                                                  | 1.774                           | 3.4155                             | 3.2934                             | Z1367324110      |
| 5REO                                                                  | 2.947                           | 3.4091                             | 3.1781                             | PCM-0102578      |
| 5RF9                                                                  | 2.635                           | 3.4047                             | 3.0218                             | Z217038356       |
| 5RFA                                                                  | 2.496                           | 3.2041                             | 4.1453                             | Z2643472210      |
| 5RFX                                                                  | 2.761                           | 3.1372                             | 2.8674                             | PCM-0102254      |
| 5R7Y                                                                  | 2.98                            | 3.0971                             | 4.025                              | Z45617795        |
| 5RFQ                                                                  | 2.635                           | 3.0684                             | 4.1089                             | PCM-0102179      |
| 5RFY                                                                  | 3.115                           | 3.0024                             | 2.409                              | PCM-0102974      |

|      |       |        |        |              |
|------|-------|--------|--------|--------------|
| 5RE4 | 2.424 | 2.9398 | 4.5754 | Z1129283193  |
| 5RFT | 2.193 | 2.8883 | 2.5828 | PCM-0102432  |
| 5RFO | 2.108 | 2.8086 | 2.4942 | PCM-0102972  |
| 5RES | 2.499 | 2.7857 | 2.6313 | PCM-0102281  |
| 5REI | 2.553 | 2.779  | 3.2856 | Z2856434856  |
| 5REK | 2.314 | 2.7101 | 2.9503 | PCM-0102327  |
| 5RFZ | 1.849 | 2.6799 | 4.1185 | PCM-0102274  |
| 5RF3 | 1.746 | 2.6759 | 3.7383 | Z1741970824  |
| 5REM | 2.096 | 2.6232 | 1.3751 | PCM-0103016  |
| 5REV | 2.5   | 2.5145 | 4.0126 | PCM-0103072  |
| 5RFI | 2.862 | 2.5014 | 2.7716 | PCM-0102353  |
| 5RED | 2.412 | 2.4959 | 2.5502 | Z2856434865  |
| 5REU | 2.325 | 2.445  | 2.1136 | PCM-0102395  |
| 5RFK | 3.47  | 2.357  | 2.4723 | PCM-0102575  |
| 5R80 | 1.86  | 2.2846 | 2.7237 | Z18197050    |
| 5REA | 2.102 | 2.2754 | 3.1157 | Z31432226    |
| 5RFV | 2.193 | 2.2753 | 2.2122 | PCM-0102306  |
| 5RF1 | 1.195 | 2.2556 | 2.3627 | NCL-00023830 |
| 5RF5 | 2.168 | 2.2053 | 2.584  | Z3241250482  |
| 5REJ | 2.421 | 2.1995 | 1.5755 | PCM-0102241  |
| 5REP | 2.397 | 2.1369 | 2.0448 | PCM-0102201  |
| 5RG0 | 1.541 | 2.1141 | 0.9612 | PCM-0102535  |
| 5RER | 2.454 | 2.0985 | 2.4968 | PCM-0102615  |
| 5RFU | 1.793 | 1.5661 | 1.4663 | PCM-0102121  |
| 5RFF | 1.839 | 1.3296 | 2.2905 | PCM-0102704  |

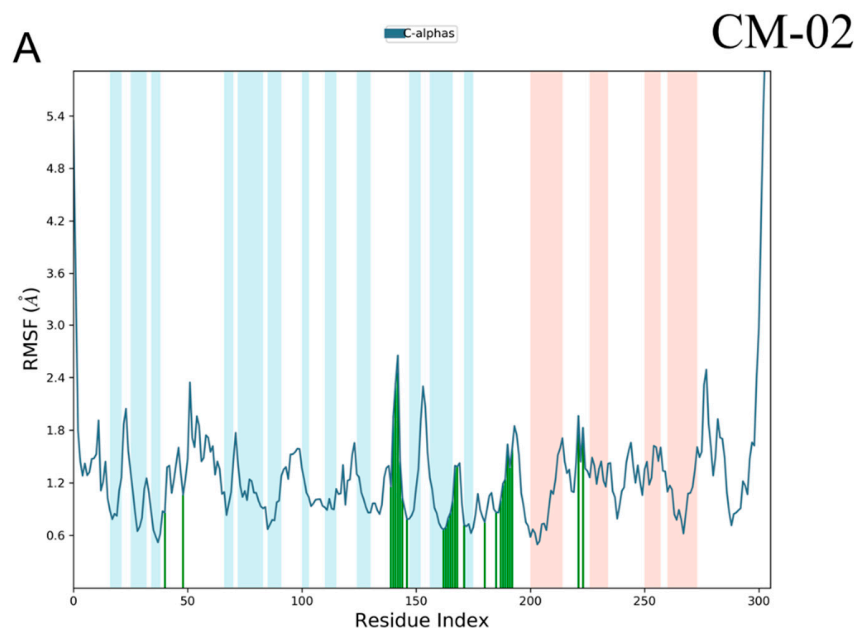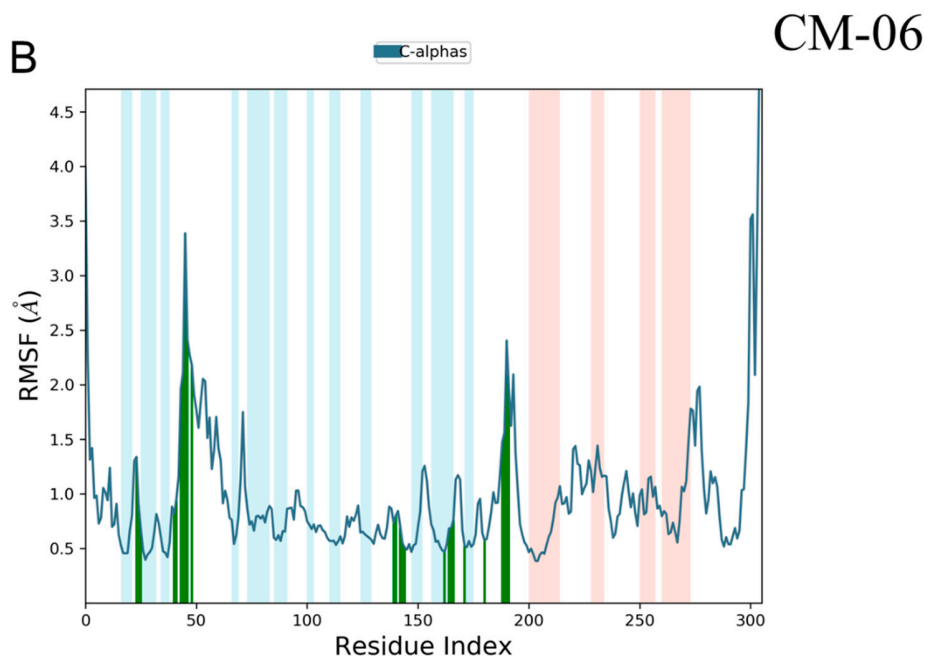

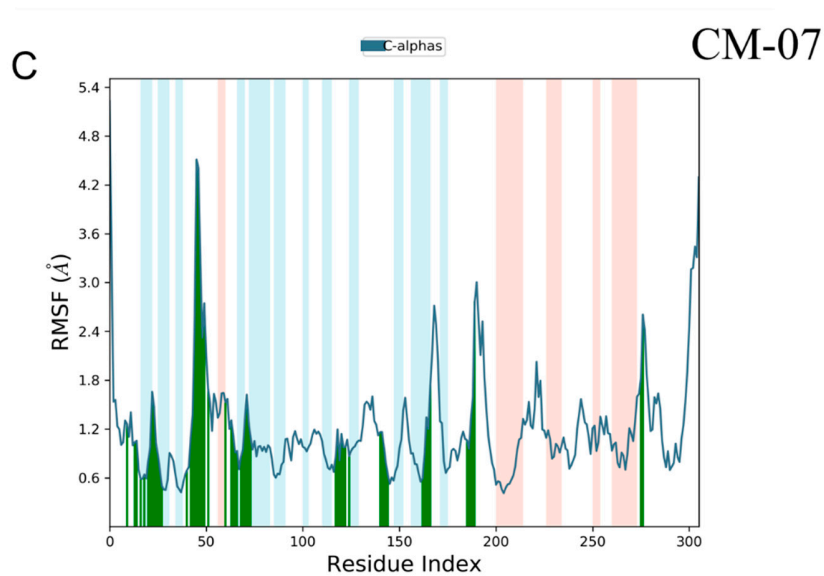

**Figure S1.** The Root Mean Square Fluctuation (RMSF) plot based on C- $\alpha$  atoms of SARS-CoV-2 Mpro (PDB ID: 6LU7) complex with (A) CM02; (B) CM06; and (C) CM07. Protein residues that interact with above compounds are marked with green vertical bars.

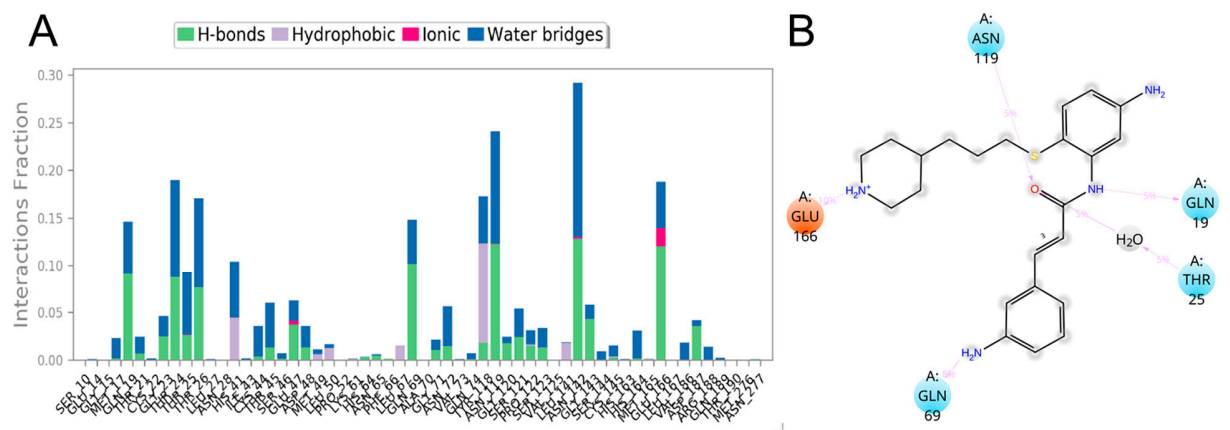

**Figure S2.** Analysis of (a) molecular interactions; and (b) type of contacts (2D interaction contour map with the key protein residues) for CM07 with SARS-CoV-2 M<sup>pro</sup> (PDB ID: 6LU7) after MD simulation.
